# Supplementary material for: Insights into Genetic Susceptibility to Melanoma by Gene Panel Testing: Potential Pathogenic Variants in ACD, ATM, BAP1, and POT1
Source: PubMed Central journal article supplement (PMC7226507; doi:10.3390/cancers12041007), 2020-04-19

Article

# Insights into genetic susceptibility to melanoma by gene panel testing: potential pathogenic variants in *ACD*, *ATM*, *BAP1*, and *POT1*

Supplementary Material

Lorenza Pastorino <sup>1,2,†</sup>, Virginia Andreotti <sup>1,2,†</sup>, Bruna Dalmasso <sup>1,2,†</sup>, Irene Vanni <sup>1,2</sup>, Giulia Ciccicarese <sup>1,2</sup>, Mario Mandalà <sup>3</sup>, Giuseppe Spadola <sup>4</sup>, Maria Antonietta Pizzichetta <sup>5</sup>, Giovanni Ponti <sup>6</sup>, Maria Grazia Tibiletti <sup>7</sup>, Elena Sala <sup>8</sup>, Maurizio Genuardi <sup>9,10</sup>, Pietro Chiurazzi <sup>9,10</sup>, Gabriele Maccanti <sup>11</sup>, Siranoush Manoukian <sup>12</sup>, Serena Sestini <sup>13</sup>, Rita Danesi <sup>14</sup>, Valentina Zampiga <sup>15</sup>, Roberta La Starza <sup>16</sup>, Ignazio Stanganelli <sup>17</sup>, Alberto Ballestrero <sup>2,18</sup>, Luca Mastracci <sup>2,19</sup>, Federica Grillo <sup>2,19</sup>, Stefania Sciallero <sup>20</sup>, Federica Cecchi <sup>21</sup>, Enrica Teresa Tanda <sup>21</sup>, Francesco Spagnolo <sup>21</sup>, Paola Queirolo <sup>21</sup>, Italian Melanoma Intergroup (IMI)<sup>22</sup>, Alisa M. Goldstein <sup>23</sup>, William Bruno<sup>1,2,†</sup> and Paola Ghiorzo <sup>1,2,†,\*</sup>

BAP1:c.327\_328insGA;p.(Pro110AspfsTer4)

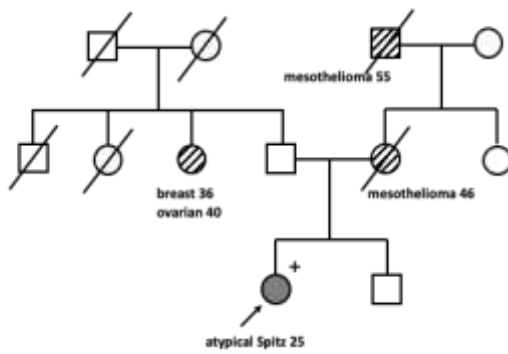

BAP1: c.639dupT;p.(Ile214TyrfstsTer29)

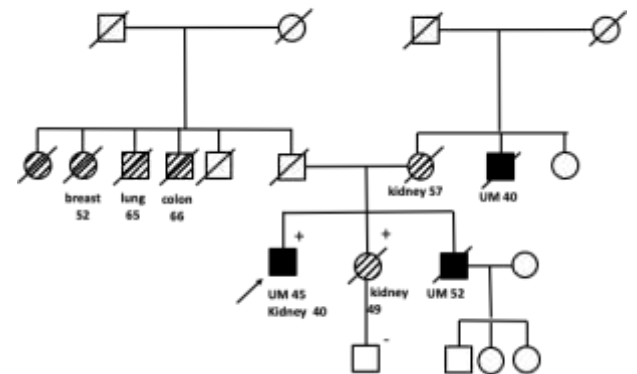

BAP1: c.1337delA;p.(Asn446ThrfsTer125)

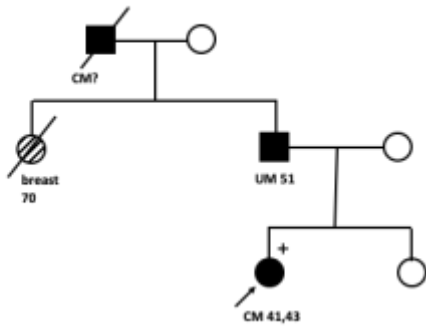

BAP1: c.1777dupC;p.(Gln593ProfsTer50)

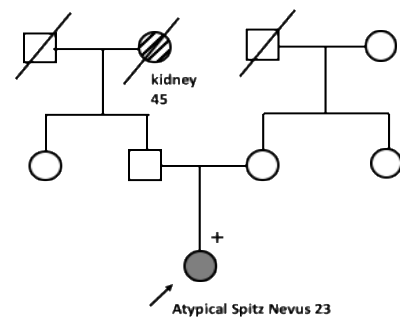

BAP1: c.1939G>T; p.(Glu647Ter)

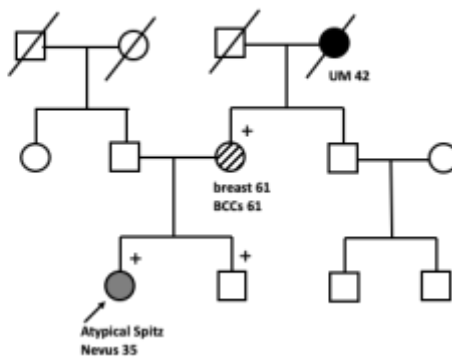

POT1: c.1687-1G>A

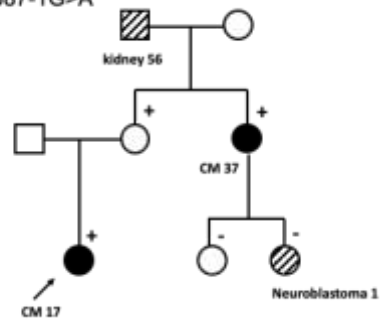

**ATM: c.3275C>A; p.Ser1092Ter**

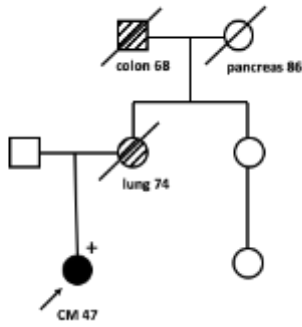

**ATM : c.4451delT; p.M1484fs**

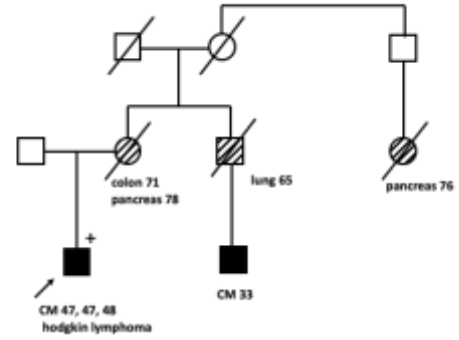

**ATM: c.5979\_5983delTAAAG; p.(Ser1993ArgfsTer23)**

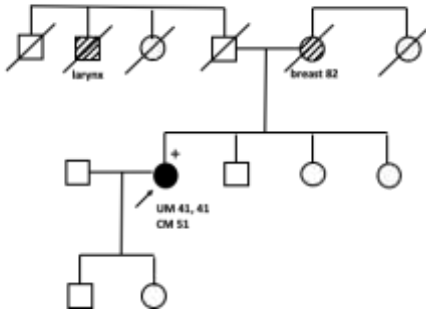

**ATM: c.8319\_8323dupTGTC; p.(Pro2775LeufsTer33)**

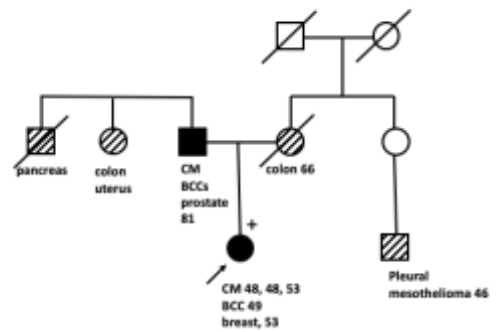

**ACD: c.866\_867delCT; p.(Pro289ArgfsTer28)**

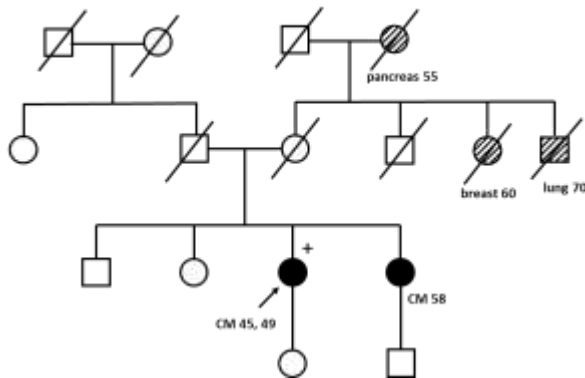

**Figure S1.** Pedigree diagrams from families carrying loss of function variants in *BAP1*, *POT1*, *ATM* and *ACD* genes. Dark symbol: cutaneous melanoma (CM), or uveal melanoma (UM). Cancer type and age at diagnosis is indicated under each symbol. The proband is indicated by an arrow.

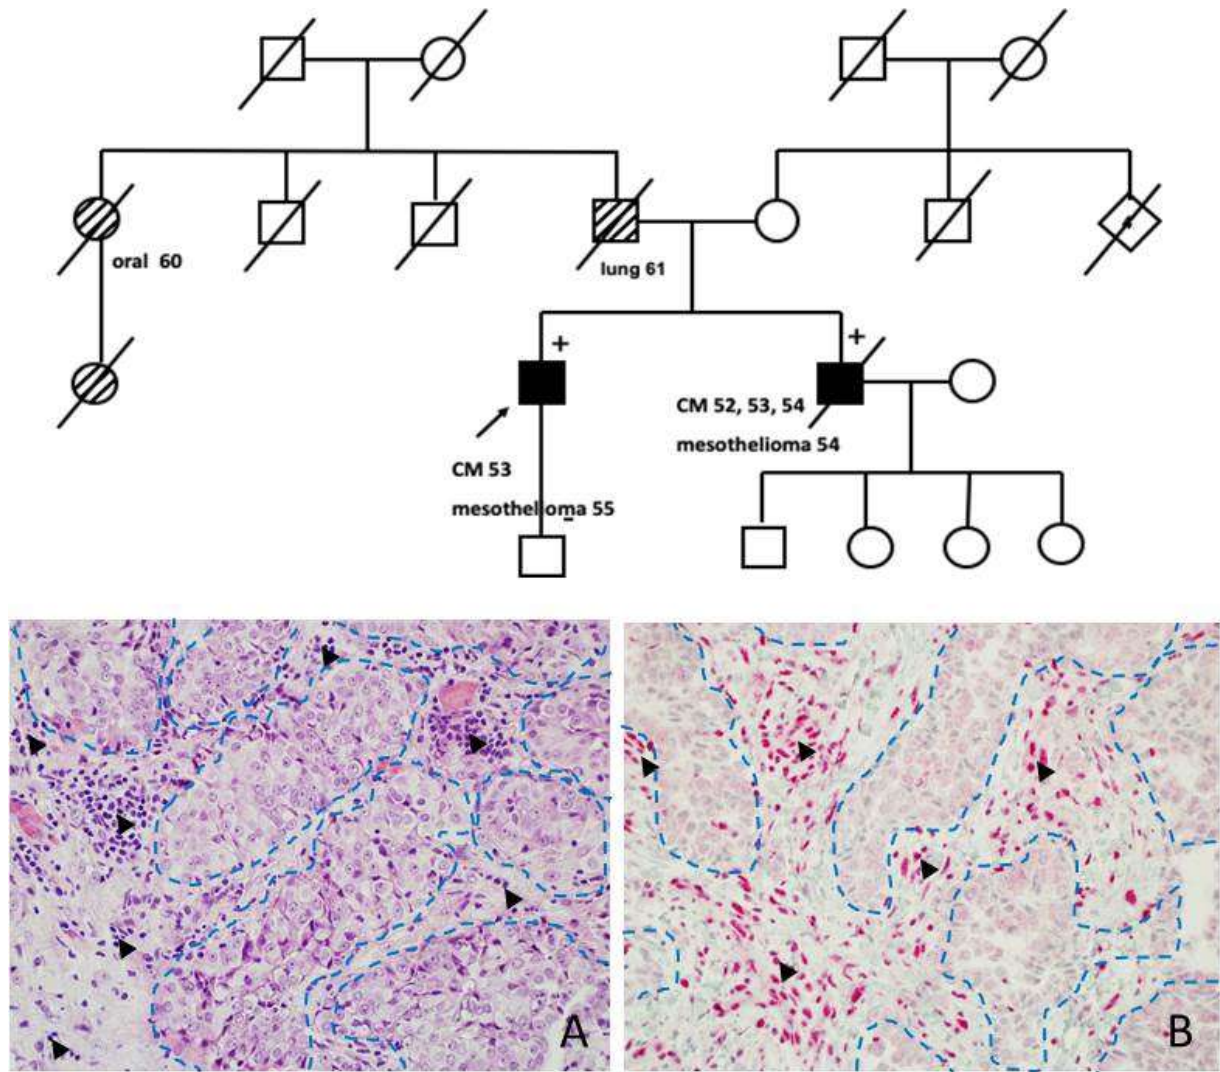

**Figure S2.** Pedigree diagram from the family with the rare *c.799\_800delCA BAP1* germline variant. The proband developed CM and was diagnosed with mesothelioma during mutation-specific follow-up. His brother had previously developed 3 CMs and mesothelioma. (A) Haematoxylin and Eosin stained section of mesothelioma from a pleural biopsy (magnification  $\times 40$ ) from the proband’s brother carrying the *c.799\_800delCA BAP1* germline variant. Within the dotted blue outline are neoplastic cells; the black arrow heads point to tumor infiltrating lymphocytes. (B) Section from the mesothelioma in (A) (magnification  $\times 40$ ) immunostained for BAP1 protein. Nuclear loss of BAP1 expression is seen in neoplastic cells within the dotted lines while the non-neoplastic lymphoid cell nuclei which serve as a control (showing no loss of BAP1 expression) stain in red (black arrow heads). Dark symbol: cutaneous melanoma (CM). Cancer type and age at diagnosis is indicated under each symbol. The black arrow in the pedigree points to the proband.

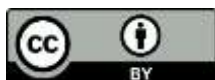

Supplement: cancers-12-01007-s001.pdf [file cancers-12-01007-s001.pdf]
